# Supplementary material
Source: Springer Nature journal article supplement (https://www.springermedizin.de/resource/supplementary/12885_2008_1522_MOESM4_ESM.pdf/9472228)

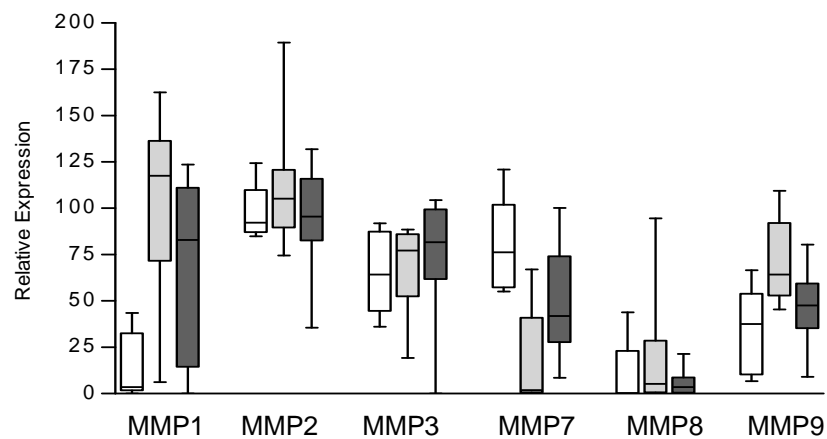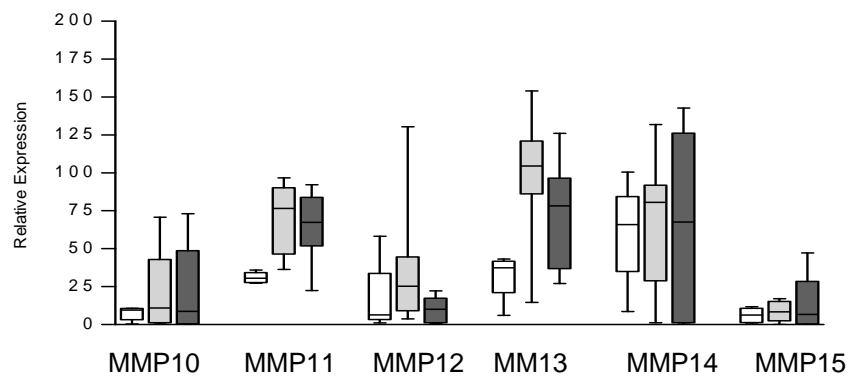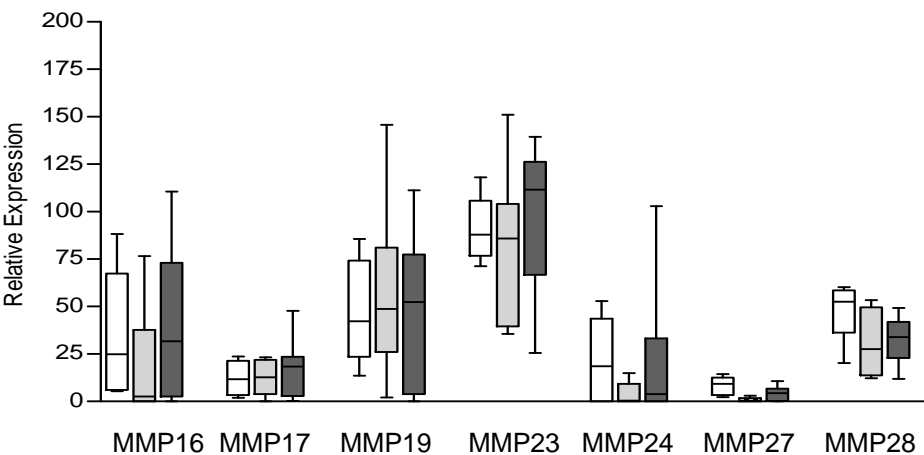

 Normal breast  
 G2  
 G3

Supplement: MOESM4 [file 9472228]
